# Supplementary material
Source: HighWire-hosted journal article supplement (https://erj.ersjournals.com/content/61/6/2300484)

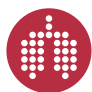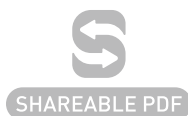

# Implication of the Global Initiative for Chronic Obstructive Lung Disease 2023 report for resource-limited settings: tracing the G in the GOLD

Bruce J. Kirenga<sup>1,2</sup>, Patricia Alupo<sup>1</sup>, Frederik van Gemert<sup>3</sup> and Rupert Jones<sup>4</sup>

<sup>1</sup>Makerere University Lung Institute, Kampala, Uganda. <sup>2</sup>Department of Medicine, Makerere University, Kampala, Uganda. <sup>3</sup>Department of Health Sciences, Groningen Research Institute for Asthma and COPD, University Medical Center Groningen, Groningen, The Netherlands. <sup>4</sup>Research and Knowledge Exchange, Plymouth Marjon University, Plymouth, UK.

Corresponding author: Bruce J. Kirenga ([brucekirenga@yahoo.co.uk](mailto:brucekirenga@yahoo.co.uk))

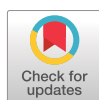

Shareable abstract (@ERSpublications)

**COPD guidelines still have blind spots for low-resource settings. If GOLD is truly to be considered a global report on COPD, more attention will need to be paid to practical solutions in global settings.** <https://bit.ly/3zusjOd>

**Cite this article as:** Kirenga BJ, Alupo P, van Gemert F, *et al*. Implication of the Global Initiative for Chronic Obstructive Lung Disease 2023 report for resource-limited settings: tracing the G in the GOLD. *Eur Respir J* 2023; 61: 2300484 [DOI: 10.1183/13993003.00484-2023].

This single-page version can be shared freely online.

Copyright ©The authors 2023.

This version is distributed under the terms of the Creative Commons Attribution Licence 4.0.

Received: 27 March 2023  
Accepted: 30 March 2023

*To the Editor:*

The new Global Initiative for Chronic Obstructive Lung Disease (GOLD) 2023 report provides a very useful synthesis of available scientific evidence to guide COPD management, research and prevention, as always [1, 2]. Important changes include the revision of the definition of the condition and the replacement of groups C and D with E, which highlights the importance of exacerbations in COPD [2].

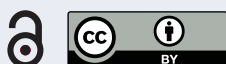

Supplement: inline-supplementary-material-1 [file inline-supplementary-material-1.pdf]
